# Supplementary material for: Beyond factor H: The impact of genetic-risk variants for age-related macular degeneration on circulating factor-H-like 1 and factor-H-related protein concentrations
Source: PubMed Central journal article supplement (PMC8387294; doi:10.1016/j.ajhg.2021.05.015), 2021-07-13
Supplement: mmc1.pdf [file mmc1.pdf]

**The American Journal of Human Genetics, Volume 108**

**Supplemental information**

**Beyond factor H: The impact of genetic-risk variants  
for age-related macular degeneration on circulating  
factor-H-like 1 and factor-H-related protein concentrations**

**Valentina Cipriani, Anna Tierney, John R. Griffiths, Verena Zuber, Panagiotis I. Sergouniotis, John R.W. Yates, Anthony T. Moore, Paul N. Bishop, Simon J. Clark, and Richard D. Unwin**





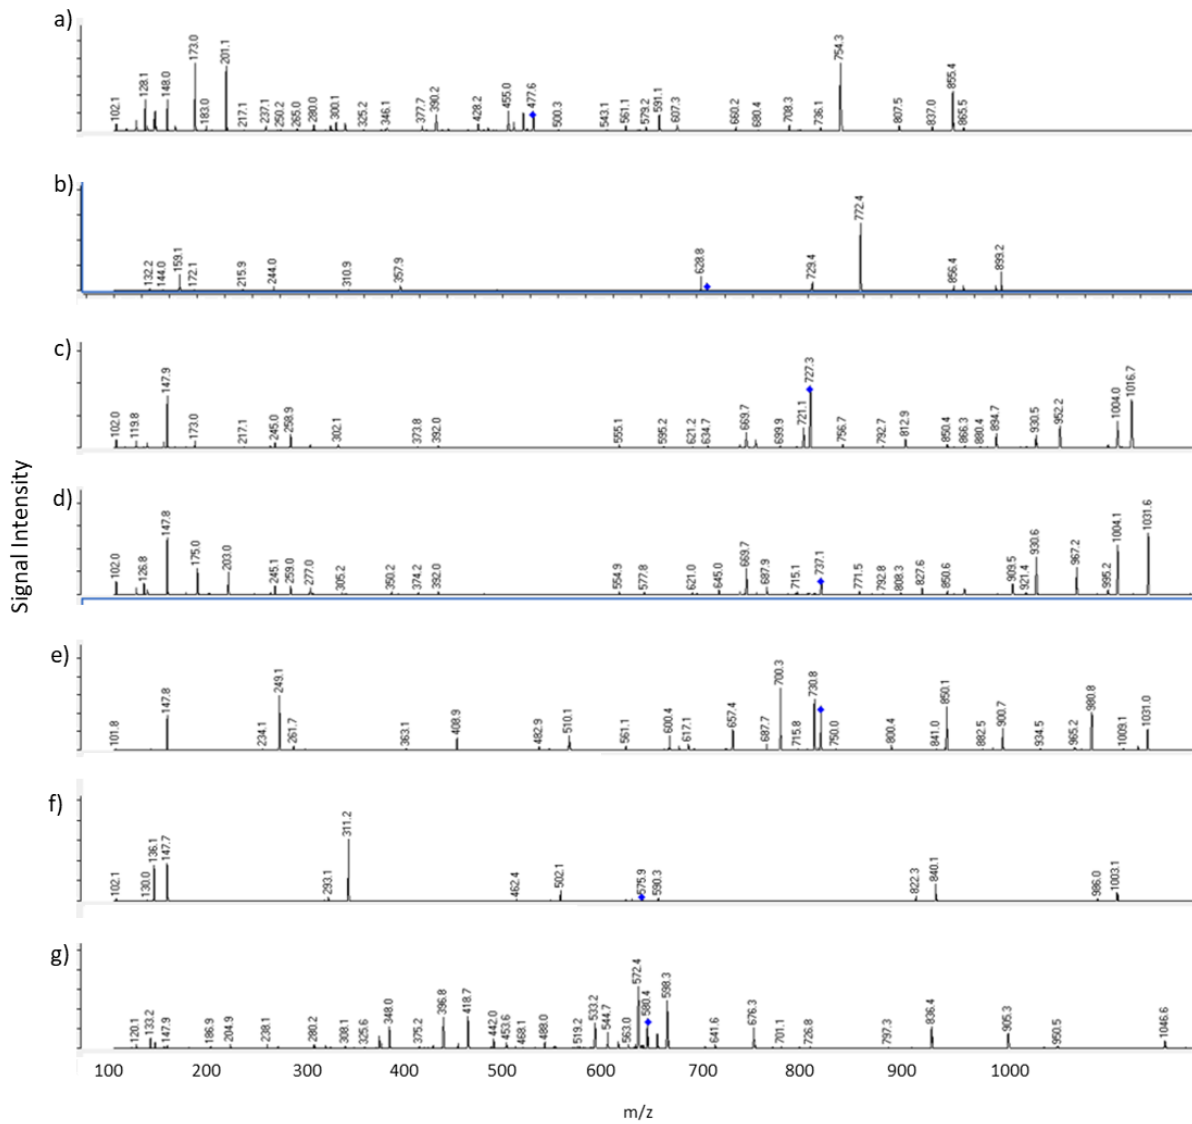

**Figure S2. MS/MS fragmentation spectra of all proteotypic peptides used for quantification of FH, FHL-1 and FHR-1 to FHR-5 proteins in human samples.**

a) VTYKcFE (FH), b) NGWSPTPRcIRVSFTL (FHL-1), c) ATFcDFPKINHGILYDEE (FHR-1), d) AMFcDFPKINHGILYDEE (FHR-2), e) VAcHPGYGLPKAQTTVTcTE (FHR-3), f) YQcQSYYE (FHR-4), and g) RGWSTPPIcSFTKGE (FHR-5).

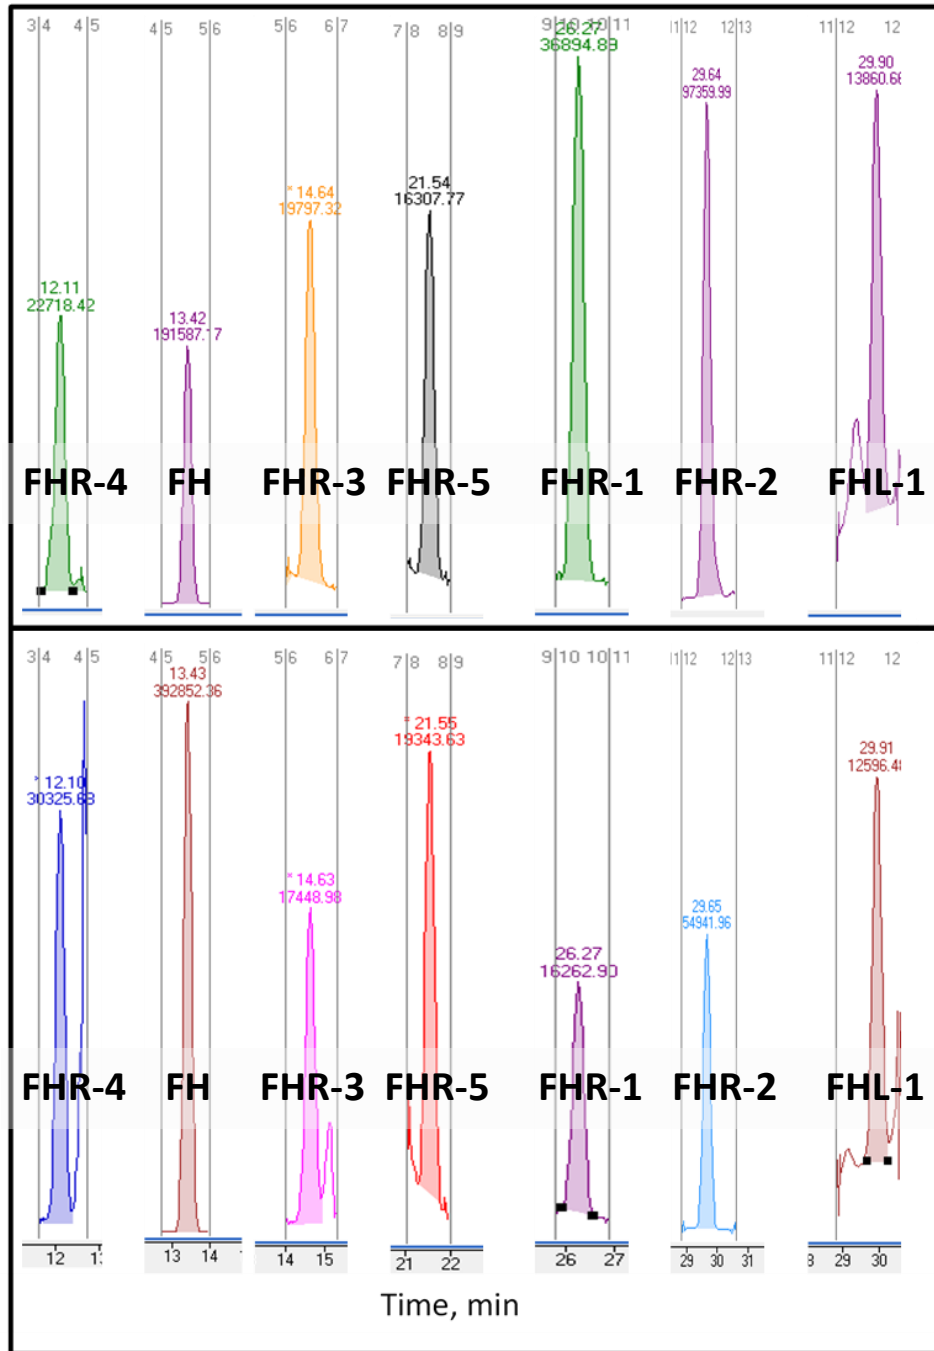

**Figure S3. Overlay of endogenous and stable isotope-labelled standard peptide SRM signals.**

To confirm assay specificity, stable isotope-labelled peptides were spiked into plasma and the elution profiles of each of the heavy:light pairs was compared to confirm specificity of the individual SRMs for each peptide. Upper panel shows signals from endogenous peptides, while the lower panel shows the equivalent SIS peptide.

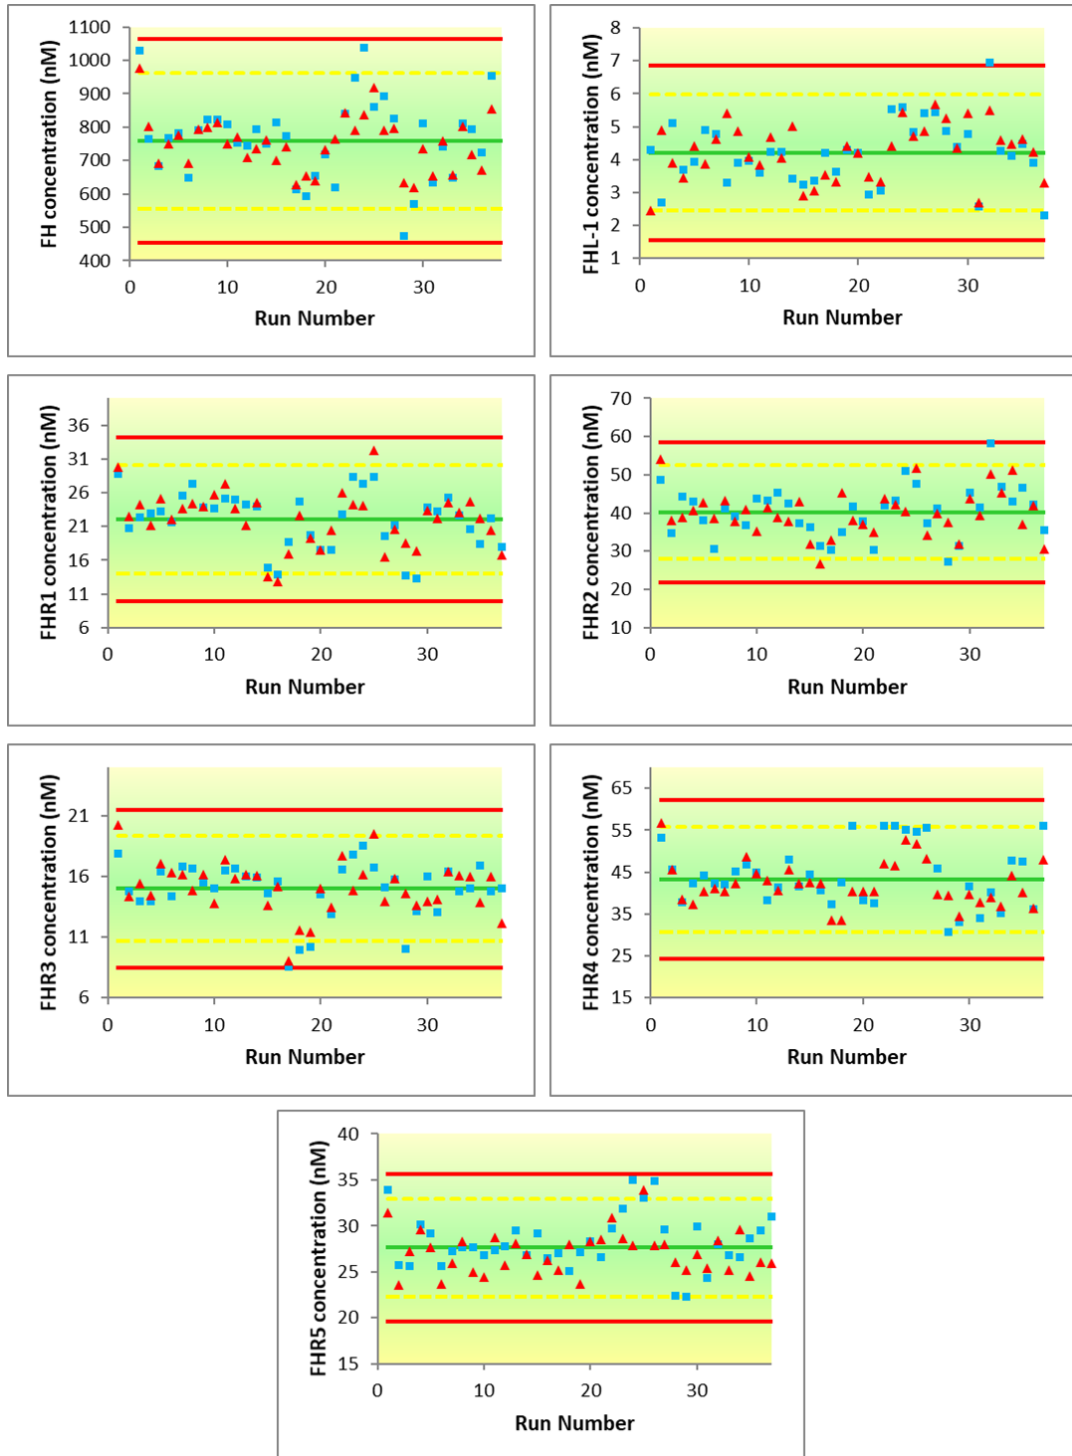

**Figure S4. Levy-Jennings graphs to monitor between-batch stability of the whole process across the course of the study.**

Measured concentrations for each protein in two replicate analyses of the same sample included in each batch were monitored. Green line = mean concentration, Yellow line =  $\pm 2$  s.d., Red line =  $\pm 3$  s.d.

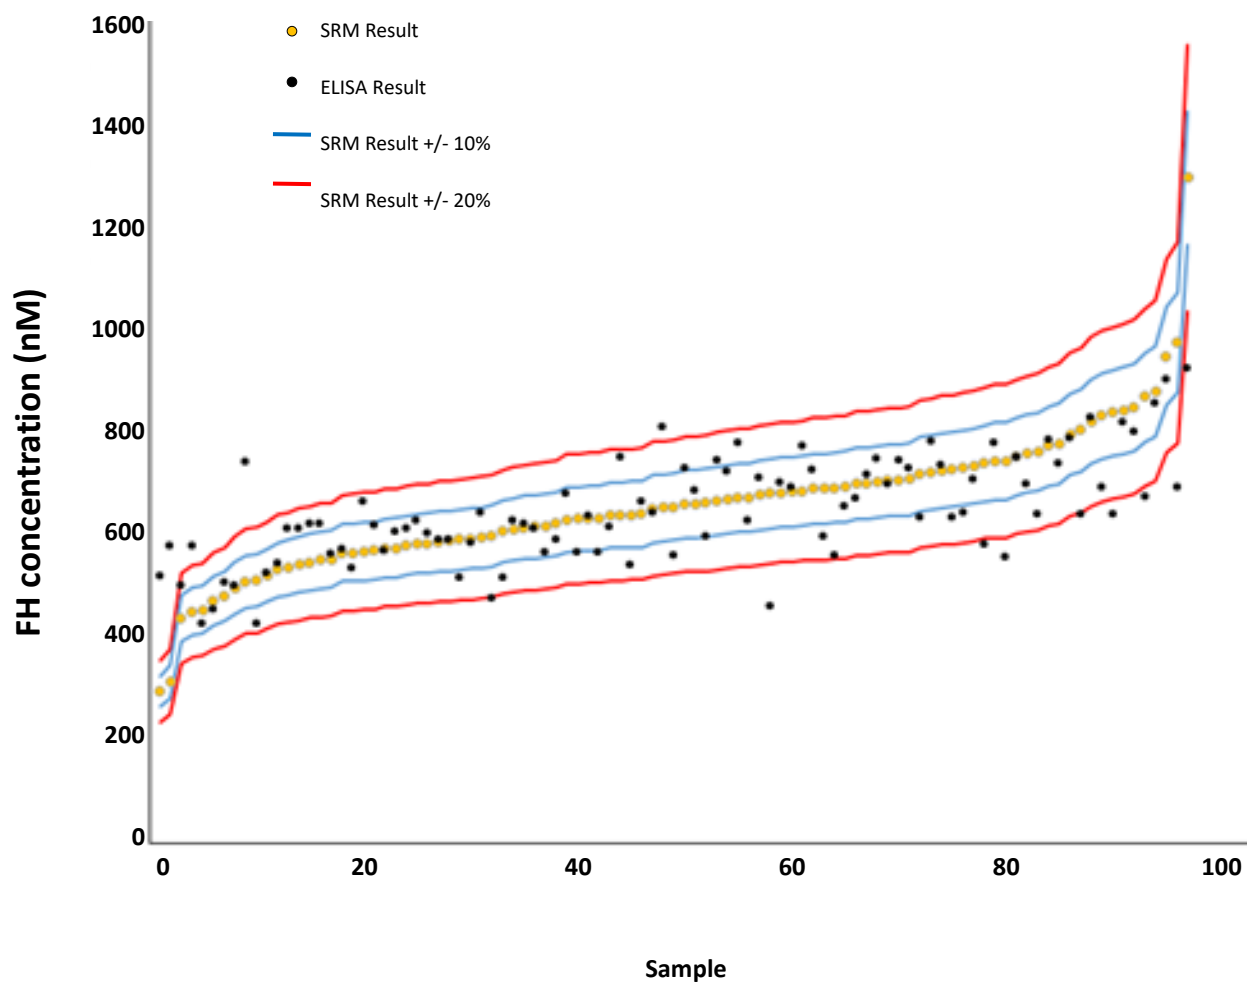

**Figure S5. Correlation between measured concentrations of FH using the LS-MS based assay and immunoassay.**

Immunoassay-derived concentrations were normalised to match the median concentration calculated by the SRM. In most case ELISA measurements are within 20% of the SRM measurement.

**A**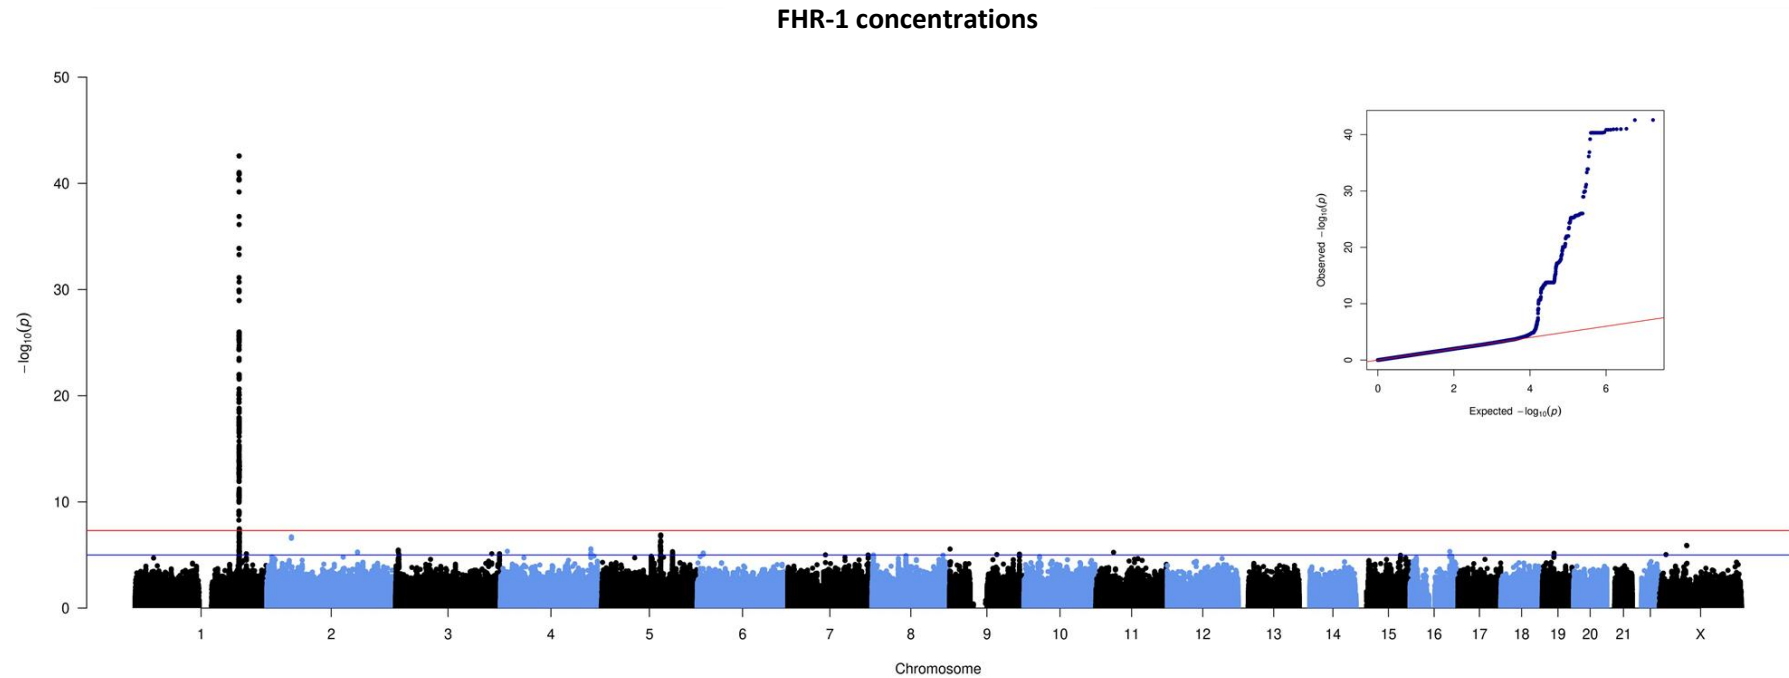

**Figure S6. GWASs of circulating FHR-1, FHR-2, FHR-3, FHR-4, FHR-5 protein concentrations in 252 controls from the Cambridge AMD cohort reveal a strong genome-wide significant signal spanning the AMD-associated *CFH* locus on chromosome 1q31.3.**

Manhattan plot together with quantile-quantile (QQ) plot (upper right-hand side of each panel) for the GWAS of FHR-1 (A), FHR-2 (B), FHR-3 (C), FHR-4 (D), FHR-5 (E), FH (F) and FHL-1 (G) protein concentrations. Manhattan plots illustrate P-values for each single variant tested for association with the protein concentrations. Observed  $-\log_{10}(P\text{-values})$  are plotted against the genomic position of each variant on chromosomes 1–22. The horizontal red line indicates the threshold considered for genome-wide significance ( $P\text{-value} \leq 5 \times 10^{-8}$ ). QQ plots compare the distribution of the observed test statistics with its expected distribution under the null hypothesis of no association. Genomic control values ( $\lambda$ )



calculated based on the 50<sup>th</sup> percentile (and 1/10<sup>th</sup> of a percentile) were equal to 1.010 (1.004), 1.014 (1.026), 0.983 (1.074), 1.012 (1.025), 0.994 (1.014), 0.991 (1.018) and 0.995 (0.998) for FHR-1, FHR-2, FHR-3, FHR-4, FHR-5, FH and FHL-1, respectively.

*(continued on the next page)*

**B**

**FHR-2 concentrations**

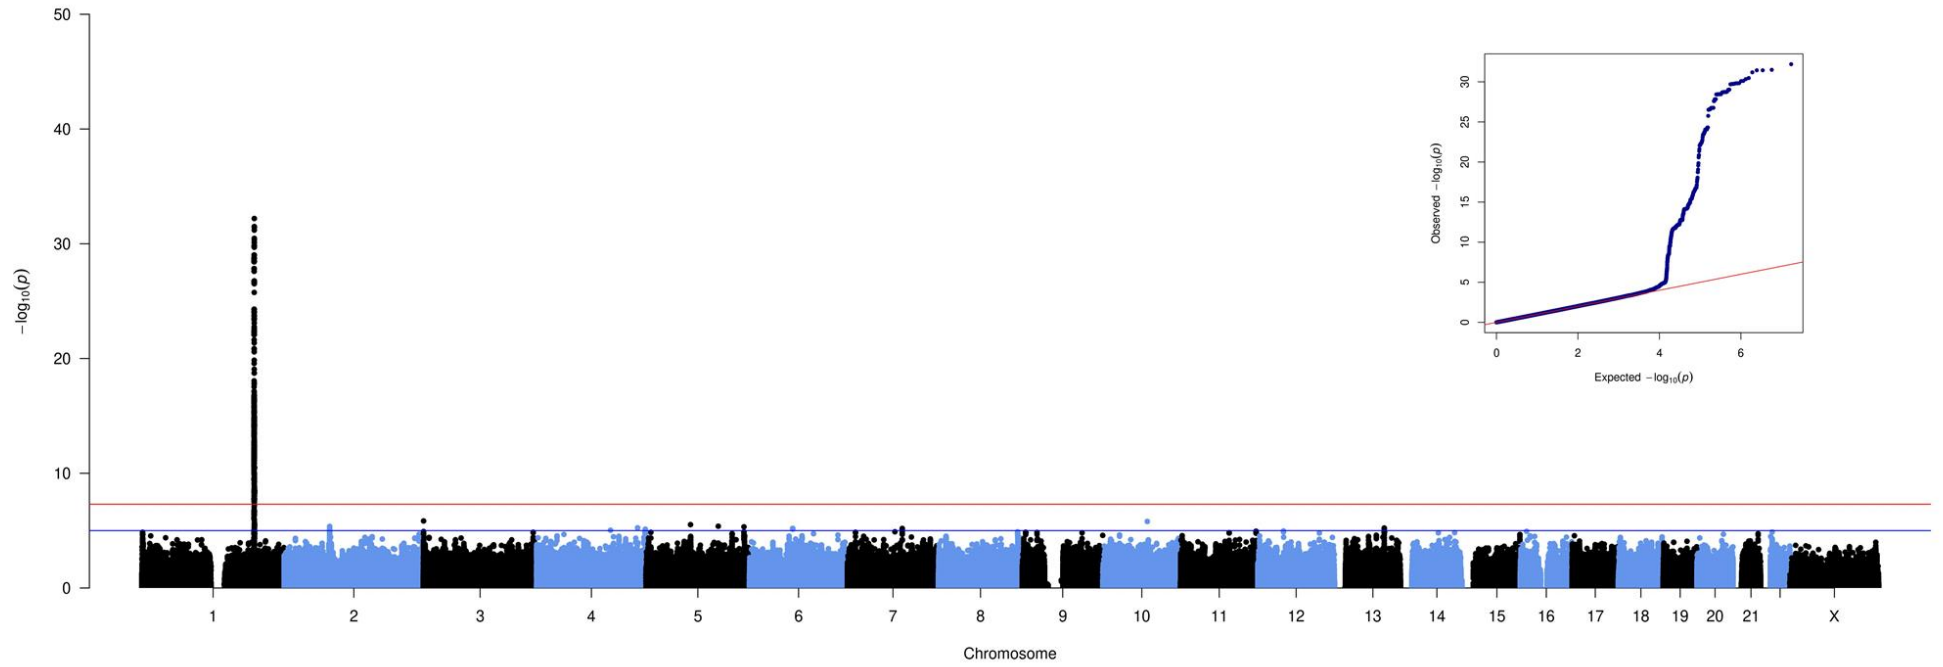

*(continued on the next page)*

C

FHR-3 concentrations

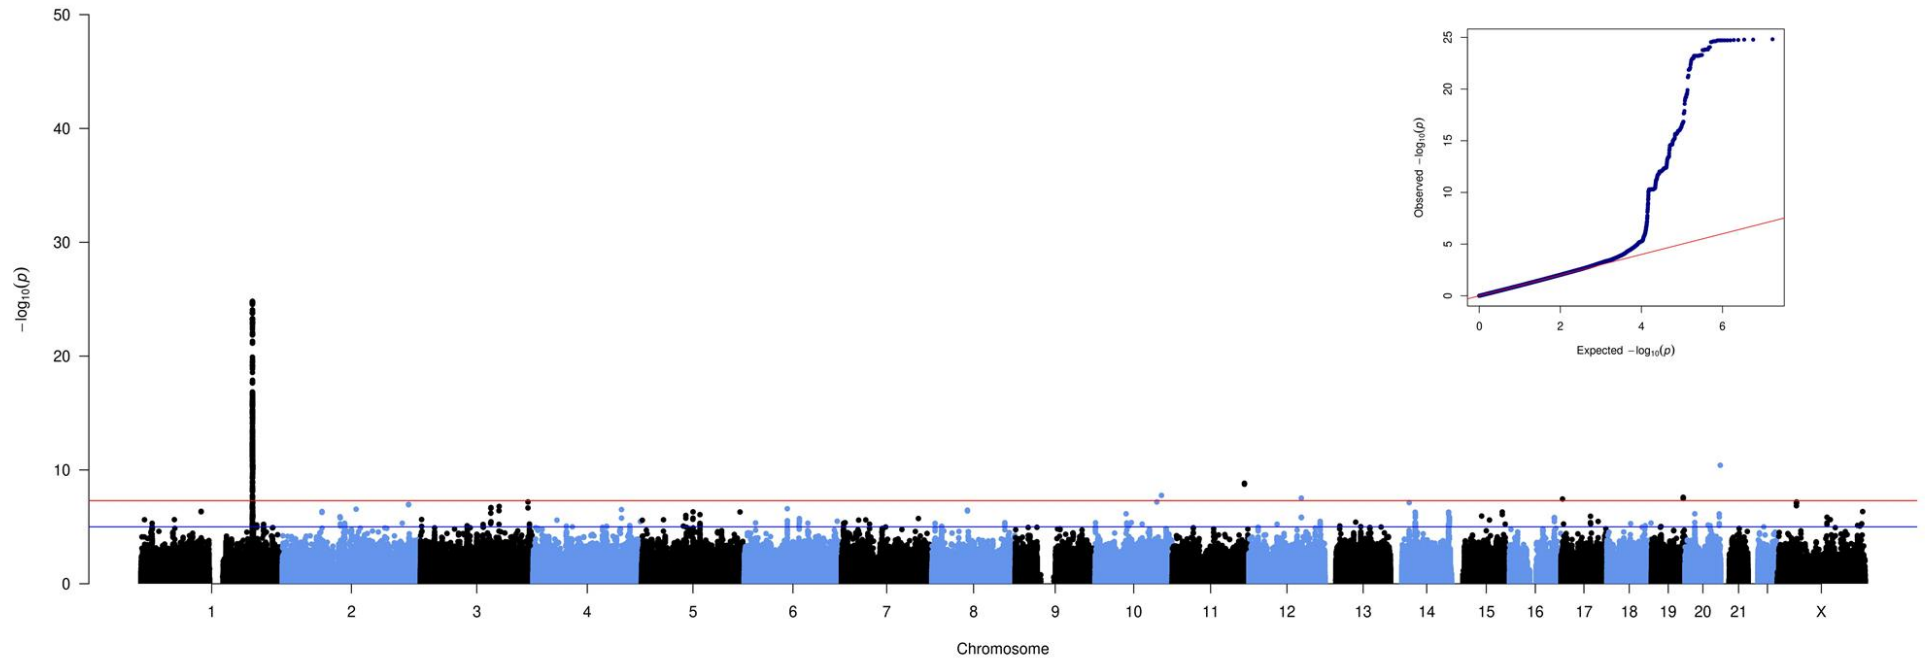

*(continued on the next page)*

D

FHR-4 concentrations

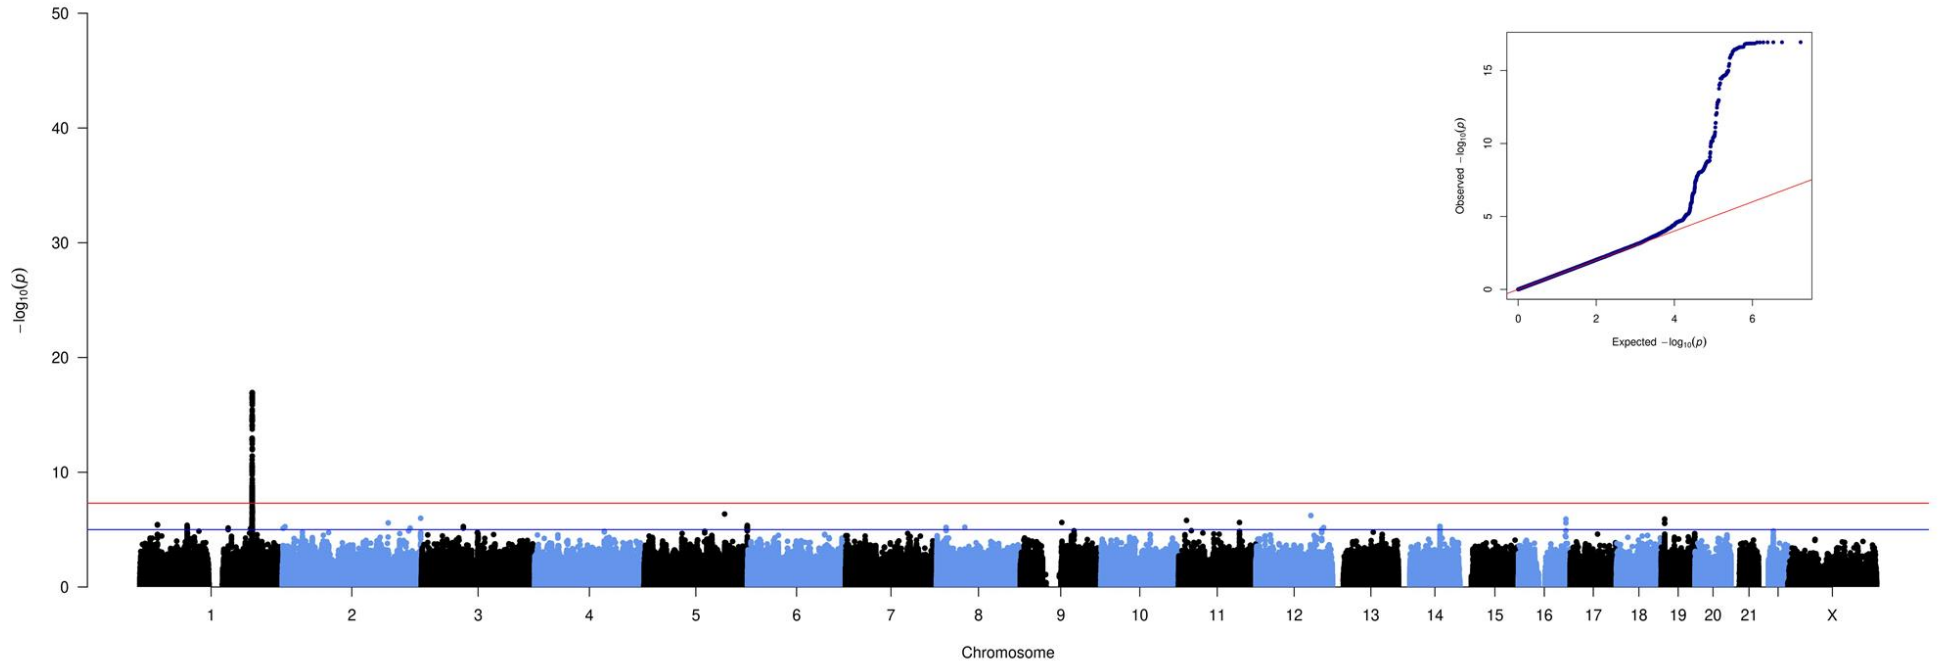

*(continued on the next page)*

**E**

**FHR-5 concentrations**

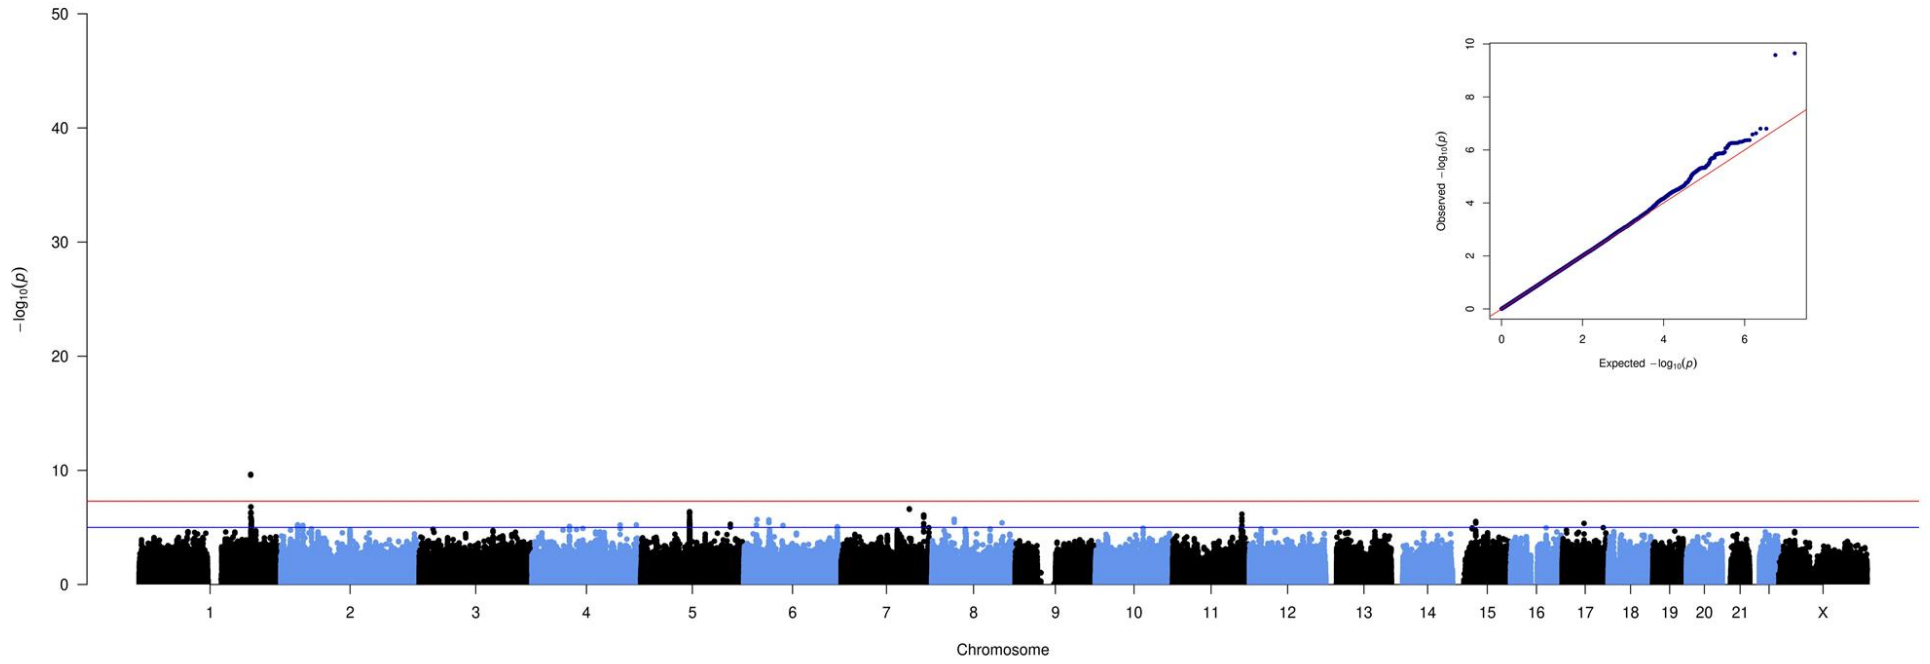

*(continued on the next page)*

**F**

**FH concentrations**

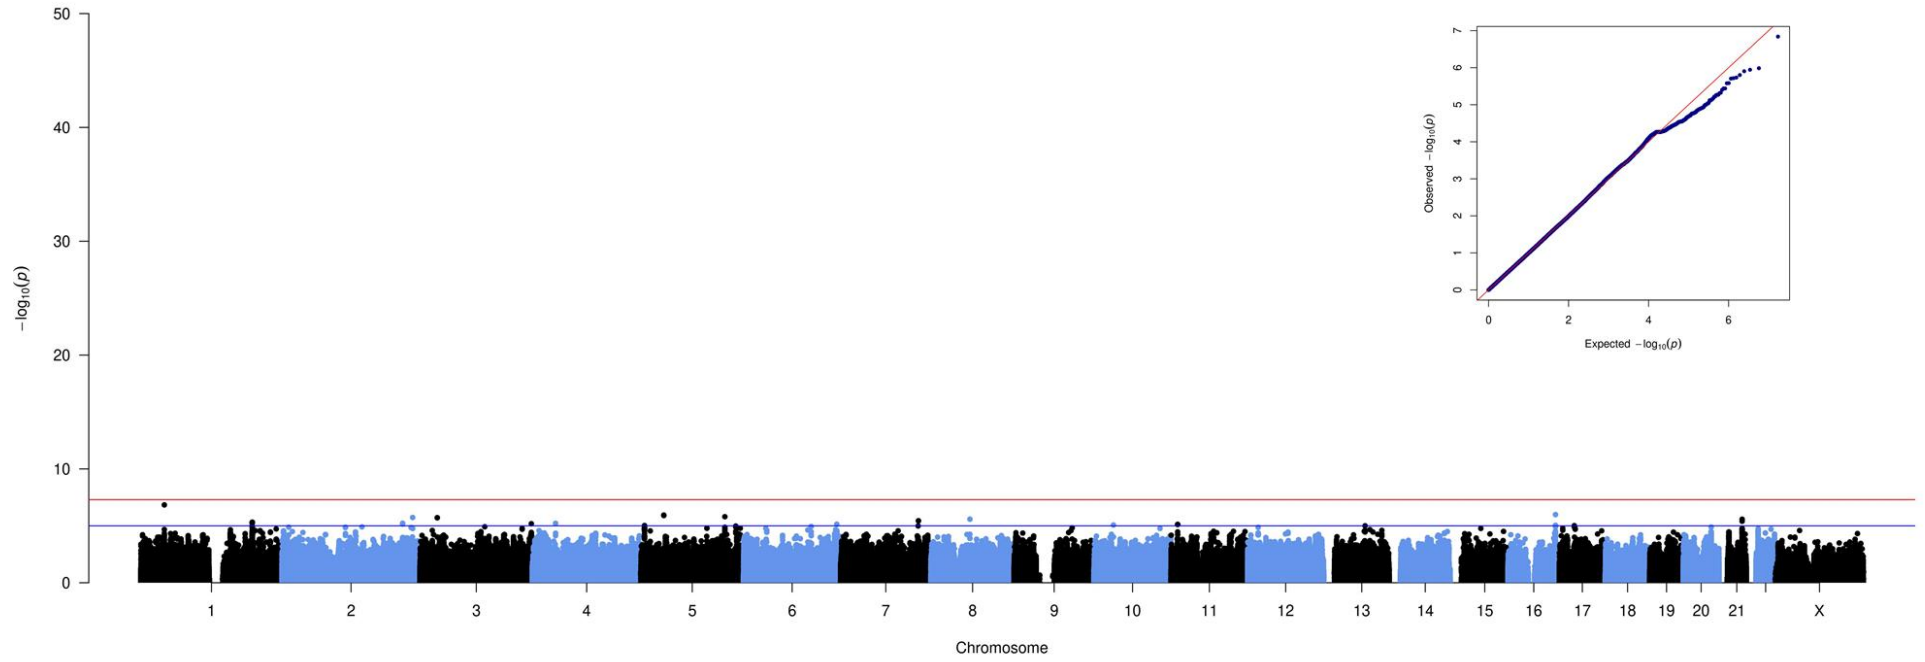

*(continued on the next page)*

**G****FHL-1 concentrations**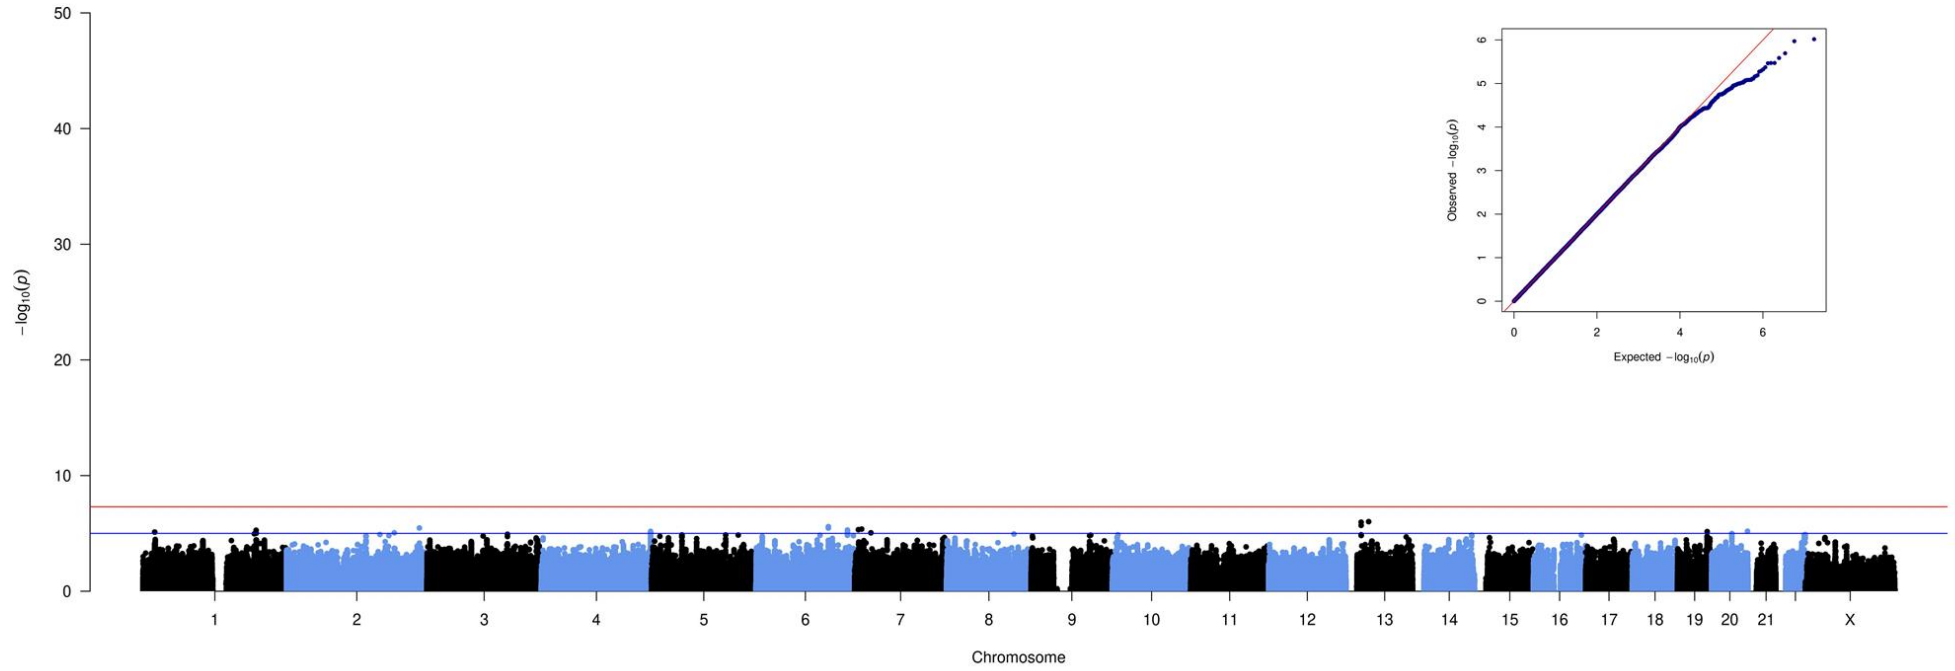

| Parameter         | Value    |
|-------------------|----------|
| Gas Temp          | 210 °C   |
| Gas Flow          | 15 l/min |
| Nebuliser         | 30 psi   |
| Sheath Gas Temp   | 250 °C   |
| Sheath Gas Flow   | 12 l/min |
| Capillary Voltage | 2650 V   |
| Nozzle Voltage    | 1000 V   |
| High Pressure RF  | 200 V    |
| Low Pressure RF   | 110 V    |

**Table S1. Liquid chromatography-selected reaction monitoring mass spectrometry (LC-SRM-MS) instrument parameters.**



| <b>Protein</b> | <b>Peptide Sequence</b>      | <b>Precursor ion m/z</b> | <b>Product ions m/z</b> | <b>Collision energy, eV</b> | <b>Dwell time, ms</b> |
|----------------|------------------------------|--------------------------|-------------------------|-----------------------------|-----------------------|
| <b>FH</b>      | VTYKcFE (Light)              | 473.7                    | 583.3, 847.4, 746.3     | 16, 16, 16                  | 400, 200, 150         |
|                | VTYKcFE (Heavy)              | 477.7                    | 591.3, 855.4, 754.3     | 16, 16, 16                  | 400, 200, 150         |
| <b>FHL-1</b>   | NGWSPTPRcIRVSFTL (Light)     | 631.2                    | 723.9, 860.5, 767.4     | 19, 19, 19                  | 150, 200, 100         |
|                | NGWSPTPRcIRVSFTL (Heavy)     | 634.3                    | 728.9, 865.5, 772.4     | 19, 19, 19                  | 150, 200, 100         |
| <b>FHR-1</b>   | ATFcDFPKINHGILYDEE (Light)   | 724.2                    | 925.6, 1011.9, 947.1    | 20, 16, 20                  | 400, 200, 200         |
|                | ATFcDFPKINHGILYDEE (Heavy)   | 727.2                    | 930.6, 1016.9, 952.1    | 20, 16, 20                  | 400, 200, 200         |
| <b>FHR-2</b>   | AMFcDFPKINHGILYDEE (Light)   | 734.0                    | 999.5, 925.9, 1027      | 18,22,18                    | 150, 125, 100         |
|                | AMFcDFPKINHGILYDEE (Heavy)   | 737.3                    | 1004.5, 930.9, 1032     | 18,22,18                    | 150, 125, 100         |
| <b>FHR-3</b>   | VAcHPGYGLPKAQTTVTcTE (Light) | 730.7                    | 1022.4, 971.7           | 16, 18                      | 350, 400              |
|                | VAcHPGYGLPKAQTTVTcTE (Heavy) | 736.7                    | 1031.4, 980.7           | 16, 18                      | 350, 400              |
| <b>FHR-4</b>   | YQcQSYYE (Light)             | 570.7                    | 830.3, 993.1, 311.1     | 11, 10, 14                  | 250, 250, 250         |
|                | YQcQSYYE (Heavy)             | 575.7                    | 840.3, 1003.1, 311.1    | 11, 10, 14                  | 250, 250, 250         |
| <b>FHR-5</b>   | RGWSTPPIcSFTKGE (Light)      | 575.2                    | 828.4, 895.5, 588.3     | 16, 15, 20                  | 200, 350, 200         |
|                | RGWSTPPIcSFTKGE (Heavy)      | 581.2                    | 836.4, 905.5, 598.3     | 16, 15, 20                  | 200, 350, 200         |

**Table S2. SRM transition parameters.**

| Protein      | Instrumental variable (IV)<br>dbSNP ID<br>(Chr:Position) <sup>a</sup><br>Non effect allele/Effect<br>allele | <i>cis</i> /<br><i>trans</i><br>pQTL | IV<br>strength<br>(R <sup>2</sup> ) <sup>b</sup> | Association with protein<br>concentrations<br>in 252 Cambridge AMD<br>study <sup>2,3</sup> controls |      |                         | Association with AMD<br>in the Cambridge AMD<br>GWAS <sup>2,3</sup><br>(845 AMD cases and 419<br>controls) |       |                        | Association with AMD<br>in the IAMDGC GWAS <sup>4</sup><br>(16,144 AMD cases and 17,832 controls) |       |                          |                              |
|--------------|-------------------------------------------------------------------------------------------------------------|--------------------------------------|--------------------------------------------------|-----------------------------------------------------------------------------------------------------|------|-------------------------|------------------------------------------------------------------------------------------------------------|-------|------------------------|---------------------------------------------------------------------------------------------------|-------|--------------------------|------------------------------|
|              |                                                                                                             |                                      |                                                  | Beta                                                                                                | SE   | P-value                 | Beta                                                                                                       | SE    | P-value                | Beta                                                                                              | SE    | P-value                  | Minor<br>Allele<br>Frequency |
| <b>FHR-2</b> | rs79351096<br>1:196918741_G/A<br>( <i>CFHR2</i> nonsynonymous)                                              | <i>cis</i>                           | 0.09                                             | -1.81                                                                                               | 0.36 | 1.2 x 10 <sup>-6</sup>  | -0.37                                                                                                      | 0.29  | 0.207                  | -0.46                                                                                             | 0.06  | 1.0 x 10 <sup>-13</sup>  | 0.019                        |
| <b>FHR-3</b> | rs16840522<br>1:196710916_T/C<br>( <i>CFH</i> intronic)                                                     | <i>cis</i>                           | 0.35                                             | -1.79                                                                                               | 0.16 | 6.1 x 10 <sup>-24</sup> | -0.74                                                                                                      | 0.125 | 4.6 x 10 <sup>-9</sup> | -0.86                                                                                             | 0.025 | 5.6 x 10 <sup>-292</sup> | 0.158                        |
| <b>FHR-4</b> | rs34538561<br>1:196534406_C/G<br>( <i>KCNT2</i> intronic)                                                   | <i>cis</i>                           | 0.12                                             | -1.63                                                                                               | 0.28 | 2.5 x 10 <sup>-8</sup>  | 0.56                                                                                                       | 0.14  | 4.0 x 10 <sup>-5</sup> | 0.51                                                                                              | 0.03  | 7.8 x 10 <sup>-92</sup>  | 0.132                        |

**Table S7. Additional instrumental variables (IVs) for FHR-2, FHR-3 and FHR-4 identified at the *CFH* locus using the GCTA-COJO<sup>5</sup> approach.**

<sup>a</sup>Chromosomal position is given according to the NCBI RefSeq hg19 human genome reference assembly; <sup>b</sup>The strength of each IV was evaluated using R<sup>2</sup> as the proportion of the variance of the protein explained by the genetic variant (function *get\_r\_from\_pn* from R package *TwoSampleMR*, version 0.5.5).

The GCTA-COJO<sup>5</sup> approach was applied with default settings; the available individual-level genotype data from the entire control set in the Cambridge AMD study,<sup>2,3</sup> n = 419, was used as a reference sample to estimate LD among genetic variants.

AMD = Age-Related macular degeneration; GWAS = Genome-wide association study; IAMDGC = International Age-Related Macular Degeneration Genomics Consortium; pQTL = protein quantitative trait locus.

## Supplemental Note

### *List of the International Age-related Macular Degeneration Genomics Consortium (IAMDGC) members*

The list reflects the author list of the previous IAMDGC publication by Fritsche *et al.*, 2016.<sup>4</sup>

Lars G Fritsche<sup>1</sup>, Wilmar Igl<sup>2</sup>, Jessica N Cooke Bailey<sup>3</sup>, Felix Grassmann<sup>4</sup>, Sebanti Sengupta<sup>1</sup>, Jennifer L Bragg-Gresham<sup>1,5</sup>, Kathryn P Burdon<sup>6</sup>, Scott J Hebbbring<sup>7</sup>, Cindy Wen<sup>8</sup>, Mathias Gorski<sup>2</sup>, Ivana K Kim<sup>9</sup>, David Cho<sup>10</sup>, Donald Zack<sup>11-15</sup>, Eric Souied<sup>16</sup>, Hendrik P N Scholl<sup>11,17</sup>, Elisa Bala<sup>18</sup>, Kristine E Lee<sup>19</sup>, David J Hunter<sup>20,21</sup>, Rebecca J Sardell<sup>22</sup>, Paul Mitchell<sup>23</sup>, Joanna E Merriam<sup>24</sup>, Valentina Cipriani<sup>25,26</sup>, Joshua D Hoffman<sup>27</sup>, Tina Schick<sup>28</sup>, Yara T E Lechanteur<sup>29</sup>, Robyn H Guymmer<sup>30</sup>, Matthew P Johnson<sup>31</sup>, Yingda Jiang<sup>32</sup>, Chloe M Stanton<sup>33</sup>, Gabriëlle H S Buitendijk<sup>34,35</sup>, Xiaowei Zhan<sup>1,36,37</sup>, Alan M Kwong<sup>1</sup>, Alexis Boleda<sup>38</sup>, Matthew Brooks<sup>38</sup>, Linn Gieser<sup>38</sup>, Rinki Ratnapriya<sup>38</sup>, Kari E Branham<sup>39</sup>, Johanna R Foerster<sup>1</sup>, John R Heckenlively<sup>39</sup>, Mohammad I Othman<sup>39</sup>, Brendan J Vote<sup>6</sup>, Helena Hai Liang<sup>30</sup>, Emmanuelle Souzeau<sup>40</sup>, Ian L McAllister<sup>41</sup>, Timothy Isaacs<sup>41</sup>, Janette Hall<sup>40</sup>, Stewart Lake<sup>40</sup>, David A Mackey<sup>6,30,41</sup>, Ian J Constable<sup>41</sup>, Jamie E Craig<sup>40</sup>, Terrie E Kitchner<sup>7</sup>, Zhenglin Yang<sup>42,43</sup>, Zhiguang Su<sup>44</sup>, Hongrong Luo<sup>8</sup>, Daniel Chen<sup>8</sup>, Hong Ouyang<sup>8</sup>, Ken Flagg<sup>8</sup>, Danni Lin<sup>8</sup>, Guanping Mao<sup>8</sup>, Henry Ferreyra<sup>8</sup>, Klaus Stark<sup>2</sup>, Claudia N von Strachwitz<sup>45</sup>, Armin Wolf<sup>46</sup>, Caroline Brandl<sup>2,4,47</sup>, Guenther Rudolph<sup>46</sup>, Matthias Olden<sup>2</sup>, Margaux A Morrison<sup>48</sup>, Denise J Morgan<sup>48</sup>, Matthew Schu<sup>49-53</sup>, Jeeyun Ahn<sup>54</sup>, Giuliana Silvestri<sup>55</sup>, Evangelia E Tsironi<sup>56</sup>, Kyu Hyung Park<sup>57</sup>, Lindsay A Farrer<sup>49-53</sup>, Anton Orlin<sup>58</sup>, Alexander Brucker<sup>59</sup>, Mingyao Li<sup>60</sup>, Christine A Curcio<sup>61</sup>, Saddek Mohand-Saïd<sup>62-65</sup>, José-Alain Sahel<sup>25,62-67</sup>, Isabelle Audo<sup>62-64,68</sup>, Mustapha Benchaboune<sup>65</sup>, Angela J Cree<sup>69</sup>, Christina A Rennie<sup>70</sup>, Srinivas V Goverdhan<sup>69</sup>, Michelle Grunin<sup>71</sup>, Shira Hagbi-Levi<sup>71</sup>, Peter Campochiaro<sup>11,13</sup>, Nicholas Katsanis<sup>72-74</sup>, Frank G Holz<sup>17</sup>, Frédéric Blond<sup>62-64</sup>, Hélène Blanché<sup>75</sup>, Jean-François Deleuze<sup>75,76</sup>, Robert P Igo Jr<sup>3</sup>, Barbara Truitt<sup>3</sup>, Neal S Peachey<sup>18,77</sup>, Stacy M Meuer<sup>19</sup>, Chelsea E Myers<sup>19</sup>, Emily L Moore<sup>19</sup>, Ronald Klein<sup>19</sup>, Michael A Hauser<sup>78-80</sup>, Eric A Postel<sup>78</sup>, Monique D Courtenay<sup>22</sup>, Stephen G Schwartz<sup>81</sup>, Jaclyn L Kovach<sup>81</sup>, William K Scott<sup>22</sup>, Gerald Liew<sup>23</sup>, Ava G Tan<sup>23</sup>, Bamini Gopinath<sup>23</sup>, John C Merriam<sup>24</sup>, R Theodore Smith<sup>24,82</sup>, Jane C Khan<sup>41,83,84</sup>, Humma Shahid<sup>84,85</sup>, Anthony T Moore<sup>25,26,86</sup>, J Allie McGrath<sup>27</sup>, Renéé Laux<sup>3</sup>, Milam A Brantley Jr<sup>87</sup>, Anita

Agarwal<sup>87</sup>, Lebriz Ersoy<sup>28</sup>, Albert Caramoy<sup>28</sup>, Thomas Langmann<sup>28</sup>, Nicole T M Saksens<sup>29</sup>, Eiko K de Jong<sup>29</sup>, Carel B Hoyng<sup>29</sup>, Melinda S Cain<sup>30</sup>, Andrea J Richardson<sup>30</sup>, Tammy M Martin<sup>88</sup>, John Blangero<sup>31</sup>, Daniel E Weeks<sup>32,89</sup>, Bal Dhillon<sup>90</sup>, Cornelia M van Duijn<sup>35</sup>, Kimberly F Doheny<sup>91</sup>, Jane Romm<sup>91</sup>, Caroline C W Klaver<sup>34,35</sup>, Caroline Hayward<sup>33</sup>, Michael B Gorin<sup>92,93</sup>, Michael L Klein<sup>88</sup>, Paul N Baird<sup>30</sup>, Anneke I den Hollander<sup>29,94</sup>, Sascha Fauser<sup>28</sup>, John R W Yates<sup>25,26,84</sup>, Rando Allikmets<sup>24,95</sup>, Jie Jin Wang<sup>23</sup>, Debra A Schaumberg<sup>20,96,97</sup>, Barbara E K Klein<sup>19</sup>, Stephanie A Hagstrom<sup>77</sup>, Itay Chowers<sup>71</sup>, Andrew J Lotery<sup>69</sup>, Thierry L veillard<sup>62-64</sup>, Kang Zhang<sup>8,44</sup>, Murray H Brilliant<sup>7</sup>, Alex W Hewitt<sup>6,30,41</sup>, Anand Swaroop<sup>38</sup>, Emily Y Chew<sup>98</sup>, Margaret A Pericak-Vance<sup>22</sup>, Margaret DeAngelis<sup>48</sup>, Dwight Stambolian<sup>10</sup>, Jonathan L Haines<sup>3,99</sup>, Sudha K Iyengar<sup>3</sup>, Bernhard H F Weber<sup>4</sup>, Gonalo R Abecasis<sup>1</sup> & Iris M Heid<sup>2</sup>

### ***IAMDGC members' affiliations***

<sup>1</sup>Center for Statistical Genetics, Department of Biostatistics, University of Michigan, Ann Arbor, Michigan, USA. <sup>2</sup>Department of Genetic Epidemiology, University of Regensburg, Regensburg, Germany. <sup>3</sup>Department of Epidemiology and Biostatistics, Case Western Reserve University School of Medicine, Cleveland, Ohio, USA. <sup>4</sup>Institute of Human Genetics, University of Regensburg, Regensburg, Germany. <sup>5</sup>Kidney Epidemiology and Cost Center, Department of Internal Medicine–Nephrology, University of Michigan, Ann Arbor, Michigan, USA. <sup>6</sup>School of Medicine, Menzies Research Institute Tasmania, University of Tasmania, Hobart, Tasmania, Australia. <sup>7</sup>Center for Human Genetics, Marshfield Clinic Research Foundation, Marshfield, Wisconsin, USA. <sup>8</sup>Department of Ophthalmology, University of California, San Diego and Veterans Affairs San Diego Health System, La Jolla, California, USA. <sup>9</sup>Retina Service, Massachusetts Eye and Ear, Department of Ophthalmology, Harvard Medical School, Boston, Massachusetts, USA. <sup>10</sup>Department of Ophthalmology, Perelman School of Medicine, University of Pennsylvania, Philadelphia, Pennsylvania, USA. <sup>11</sup>Department of Ophthalmology, Wilmer Eye Institute, Johns Hopkins University School of Medicine, Baltimore, Maryland, USA. <sup>12</sup>Department of Molecular Biology and Genetics, Johns Hopkins University School of Medicine, Baltimore, Maryland, USA. <sup>13</sup>Department of Neuroscience, Johns Hopkins University School of Medicine, Baltimore, Maryland, USA. <sup>14</sup>Institute of Genetic Medicine, Johns Hopkins University School of Medicine, Baltimore, Maryland, USA. <sup>15</sup>Institut de la Vision, Universit  Pierre et Marie Curie, Paris, France. <sup>16</sup>H pital Intercommunal de Cr teil, H pital Henri Mondor, Universit  Paris Est Cr teil,

Créteil, France. <sup>17</sup>Department of Ophthalmology, University of Bonn, Bonn, Germany. <sup>18</sup>Louis Stokes Cleveland Veterans Affairs Medical Center, Cleveland, Ohio, USA. <sup>19</sup>Department of Ophthalmology and Visual Sciences, University of Wisconsin, Madison, Wisconsin, USA. <sup>20</sup>Department of Epidemiology, Harvard School of Public Health, Boston, Massachusetts, USA. <sup>21</sup>Department of Nutrition, Harvard School of Public Health, Boston, Massachusetts, USA. <sup>22</sup>John P. Hussman Institute for Human Genomics, Miller School of Medicine, University of Miami, Miami, Florida, USA. <sup>23</sup>Centre for Vision Research, Department of Ophthalmology and Westmead Millennium Institute for Medical Research, University of Sydney, Sydney, New South Wales, Australia. <sup>24</sup>Department of Ophthalmology, Columbia University, New York, New York, USA. <sup>25</sup>University College London Institute of Ophthalmology, University College London, London, UK. <sup>26</sup>Moorfields Eye Hospital, London, UK. <sup>27</sup>Center for Human Genetics Research, Vanderbilt University Medical Center, Nashville, Tennessee, USA. <sup>28</sup>Department of Ophthalmology, University Hospital of Cologne, Cologne, Germany. <sup>29</sup>Department of Ophthalmology, Radboud University Medical Centre, Nijmegen, the Netherlands. <sup>30</sup>Centre for Eye Research Australia, University of Melbourne, Royal Victorian Eye and Ear Hospital, East Melbourne, Victoria, Australia. <sup>31</sup>South Texas Diabetes and Obesity Institute, School of Medicine, University of Texas Rio Grande Valley, Brownsville, Texas, USA. <sup>32</sup>Department of Biostatistics, Graduate School of Public Health, University of Pittsburgh, Pittsburgh, Pennsylvania, USA. <sup>33</sup>Medical Research Council (MRC) Human Genetics Unit, Institute of Genetics and Molecular Medicine, University of Edinburgh, Edinburgh, UK. <sup>34</sup>Department of Ophthalmology, Erasmus Medical Center, Rotterdam, the Netherlands. <sup>35</sup>Department of Epidemiology, Erasmus Medical Center, Rotterdam, the Netherlands. <sup>36</sup>Quantitative Biomedical Research Center, Department of Clinical Science, University of Texas Southwestern Medical Center, Dallas, Texas, USA. <sup>37</sup>Center for the Genetics of Host Defense, University of Texas Southwestern Medical Center, Dallas, Texas, USA. <sup>38</sup>Neurobiology, Neurodegeneration and Repair Laboratory (N-NRL), National Eye Institute, US National Institutes of Health, Bethesda, Maryland, USA. <sup>39</sup>Department of Ophthalmology and Visual Sciences, University of Michigan, Kellogg Eye Center, Ann Arbor, Michigan, USA. <sup>40</sup>Department of Ophthalmology, Flinders Medical Centre, Flinders University, Adelaide, South Australia, Australia. <sup>41</sup>Centre for Ophthalmology and Visual Science, Lions Eye Institute, University of Western Australia, Perth, Western Australia, Australia. <sup>42</sup>Sichuan Provincial Key Laboratory for Human Disease Gene Study, Hospital of the University of Electronic Science and Technology of China and Sichuan Provincial People's Hospital, Chengdu, China. <sup>43</sup>Sichuan Translational Medicine Hospital, Chinese Academy of

Sciences, Chengdu, China. <sup>44</sup>Molecular Medicine Research Center, State Key Laboratory of Biotherapy, West China Hospital, Sichuan University, Chengdu, China. <sup>45</sup>EyeCentre Southwest, Stuttgart, Germany. <sup>46</sup>University Eye Clinic, Ludwig Maximilians University, Munich, Germany. <sup>47</sup>Department of Ophthalmology, University Hospital Regensburg, Regensburg, Germany. <sup>48</sup>Department of Ophthalmology and Visual Sciences, University of Utah, Salt Lake City, Utah, USA. <sup>49</sup>Department of Medicine (Biomedical Genetics), Boston University Schools of Medicine and Public Health, Boston, Massachusetts, USA. <sup>50</sup>Department of Ophthalmology, Boston University Schools of Medicine and Public Health, Boston, Massachusetts, USA. <sup>51</sup>Department of Neurology, Boston University Schools of Medicine and Public Health, Boston, Massachusetts, USA. <sup>52</sup>Department of Epidemiology, Boston University Schools of Medicine and Public Health, Boston, Massachusetts, USA. <sup>53</sup>Department of Biostatistics, Boston University Schools of Medicine and Public Health, Boston, Massachusetts, USA. <sup>54</sup>Department of Ophthalmology, Seoul Metropolitan Government Seoul National University Boramae Medical Center, Seoul, Republic of Korea. <sup>55</sup>Centre for Experimental Medicine, Queen's University, Belfast, UK. <sup>56</sup>Department of Ophthalmology, University of Thessaly, School of Medicine, Larissa, Greece. <sup>57</sup>Department of Ophthalmology, Seoul National University Bundang Hospital, Seongnam, Republic of Korea. <sup>58</sup>Department of Ophthalmology, Weill Cornell Medical College, New York, New York, USA. <sup>59</sup>Scheie Eye Institute, Department of Ophthalmology, University of Pennsylvania Perelman School of Medicine, Philadelphia, Pennsylvania, USA. <sup>60</sup>Department of Biostatistics and Epidemiology, University of Pennsylvania Perelman School of Medicine, Philadelphia, Pennsylvania, USA. <sup>61</sup>Department of Ophthalmology, University of Alabama at Birmingham, Birmingham, Alabama, USA. <sup>62</sup>INSERM, Paris, France. <sup>63</sup>Institut de la Vision, Department of Genetics, Paris, France. <sup>64</sup>Centre National de la Recherche Scientifique (CNRS), Paris, France. <sup>65</sup>Centre Hospitalier National d'Ophthalmologie des Quinze-Vingts, Paris, France. <sup>66</sup>Fondation Ophtalmologique Adolphe de Rothschild, Paris, France. <sup>67</sup>Académie des Sciences–Institut de France, Paris, France. <sup>68</sup>Department of Molecular Genetics, Institute of Ophthalmology, London, UK. <sup>69</sup>Clinical and Experimental Sciences, Faculty of Medicine, University of Southampton, Southampton, UK. <sup>70</sup>University Hospital Southampton, Southampton, UK. <sup>71</sup>Department of Ophthalmology, Hadassah Hebrew University Medical Center, Jerusalem, Israel. <sup>72</sup>Center for Human Disease Modeling, Duke University, Durham, North Carolina, USA. <sup>73</sup>Department of Cell Biology, Duke University, Durham, North Carolina, USA. <sup>74</sup>Department of Pediatrics, Duke University, Durham, North Carolina, USA. <sup>75</sup>Centre d'Etude du Polymorphisme Humain (CEPH) Fondation Jean Dausset, Paris, France. <sup>76</sup>Commissariat à

l'Energie Atomique et aux Energies Alternatives (CEA), Institut de Génomique, Centre National de Génotypage, Evry, France. <sup>77</sup>Cole Eye Institute, Cleveland Clinic, Cleveland, Ohio, USA. <sup>78</sup>Department of Ophthalmology, Duke University Medical Center, Durham, North Carolina, USA. <sup>79</sup>Department of Medicine, Duke University Medical Center, Durham, North Carolina, USA. <sup>80</sup>Duke Molecular Physiology Institute, Duke University Medical Center, Durham, North Carolina, USA. <sup>81</sup>Bascom Palmer Eye Institute, University of Miami Miller School of Medicine, Naples, Florida, USA. <sup>82</sup>Department of Ophthalmology, New York University School of Medicine, New York, New York, USA. <sup>83</sup>Department of Ophthalmology, Royal Perth Hospital, Perth, Western Australia, Australia. <sup>84</sup>Department of Medical Genetics, Cambridge Institute for Medical Research, University of Cambridge, Cambridge, UK. <sup>85</sup>Department of Ophthalmology, Cambridge University Hospitals National Health Service (NHS) Foundation Trust, Cambridge, UK. <sup>86</sup>Department of Ophthalmology, University of California San Francisco Medical School, San Francisco, California, USA. <sup>87</sup>Department of Ophthalmology and Visual Sciences, Vanderbilt University, Nashville, Tennessee, USA. <sup>88</sup>Casey Eye Institute, Oregon Health and Science University, Portland, Oregon, USA. <sup>89</sup>Department of Human Genetics, Graduate School of Public Health, University of Pittsburgh, Pittsburgh, Pennsylvania, USA. <sup>90</sup>School of Clinical Sciences, University of Edinburgh, Edinburgh, UK. <sup>91</sup>Center for Inherited Disease Research (CIDR) Institute of Genetic Medicine, Johns Hopkins University School of Medicine, Baltimore, Maryland, USA. <sup>92</sup>Department of Ophthalmology, David Geffen School of Medicine, Stein Eye Institute, University of California, Los Angeles, Los Angeles, California, USA. <sup>93</sup>Department of Human Genetics, David Geffen School of Medicine, University of California, Los Angeles, Los Angeles, California, USA. <sup>94</sup>Department of Human Genetics, Radboud University Medical Centre, Nijmegen, the Netherlands. <sup>95</sup>Department of Pathology and Cell Biology, Columbia University, New York, New York, USA. <sup>96</sup>Center for Translational Medicine, Moran Eye Center, University of Utah School of Medicine, Salt Lake City, Utah, USA. <sup>97</sup>Division of Preventive Medicine, Brigham and Women's Hospital, Harvard Medical School, Boston, Massachusetts, USA. <sup>98</sup>Division of Epidemiology and Clinical Applications, Clinical Trials Branch, National Eye Institute, US National Institutes of Health, Bethesda, Maryland, USA. <sup>99</sup>Institute for Computational Biology, Case Western Reserve University School of Medicine, Cleveland, Ohio, USA.

## Supplemental References

1. Consortium, G.T. (2015). Human genomics. The Genotype-Tissue Expression (GTEx) pilot analysis: multitissue gene regulation in humans. *Science* 348, 648-660.
2. Cipriani, V., Leung, H.T., Plagnol, V., Bunce, C., Khan, J.C., Shahid, H., Moore, A.T., Harding, S.P., Bishop, P.N., Hayward, C., et al. (2012). Genome-wide association study of age-related macular degeneration identifies associated variants in the TNXB-FKBPL-NOTCH4 region of chromosome 6p21.3. *Hum Mol Genet* 21, 4138-4150.
3. Yates, J.R.W., Sepp, T., Matharu, B.K., Khan, J.C., Thurlby, D.A., Shahid, H., Clayton, D.G., Hayward, C., Morgan, J., Wright, A.F., et al. (2007). Complement C3 variant and the risk of age-related macular degeneration. *New Engl J Med* 357, 553-561.
4. Fritsche, L.G., Igl, W., Bailey, J.N.C., Grassmann, F., Sengupta, S., Bragg-Gresham, J.L., Burdon, K.P., Hebbiring, S.J., Wen, C., Gorski, M., et al. (2016). A large genome-wide association study of age-related macular degeneration highlights contributions of rare and common variants. *Nature Genetics* 48, 134-143.
5. Yang, J., Ferreira, T., Morris, A.P., Medland, S.E., Madden, P.A.F., Heath, A.C., Martin, N.G., Montgomery, G.W., Weedon, M.N., Loos, R.J., et al. (2012). Conditional and joint multiple-SNP analysis of GWAS summary statistics identifies additional variants influencing complex traits. *Nature Genetics* 44, 369-U170.
